# Supplementary material
Source: publisher figshare collection journal article supplement (https://tandf.figshare.com/ndownloader/files/17907248)
Supplement: Supplementary file 1 [file 17907248]

| Supplementary table 1: Collection details, voucher accession numbers and GenBank accession numbers for sampled taxa. * Indicates species selected for species tree. | | | | |  |
| --- | --- | --- | --- | --- | --- |
| Specimen  code | *Species* | Location | Voucher accession nos. | COI Genbank accession # | H3 Genbank accession # |
| CICLW044 | *Cambridgea ambigua*  Blest & Vink, 2000 | NZ, NN, Motueka, (40°59'31.6''S, 173°0'38.1''E), 18.iv.2016, LAW, C.E. Forster | NZAC03014725 | MK910950 | MK911579 |
| G8S056 | *Cambridgea ambigua*  Blest & Vink, 2000 | NZ, MC, Woolston, (43°32'58.1''S, 172°40'55.2''E), 23.iv.2014, G.P. Raper | NZAC03014726 | MK910957 | MK911597 |
| *JUN14 | *Cambridgea ambigua*  Blest & Vink, 2000 | NZ, BR, Boyle River, (42°51'9.3''S, 172°38'4''E), 15.iii.2014, CJV | NZAC03014727 | MK910938 | MK911553 |
| CIGLW038 | *Cambridgea annulata*  Dalmas 1917 | NZ, CH, Chatham Island, (43°45'39.2''S, 176°34'18.6''E), 2.iii.2016, LAW, A.F. Probert | NZAC03014728 | MK910930 | MK911571 |
| DIELW031 | *Cambridgea annulata*  Dalmas 1917 | NZ, CH, Chatham Island, (43°51'31.8''S, 176°33'12.7''E), 30.i.2016, LAW, A.F. Probert | NZAC03014729 | MK910952 | MK911551 |
| DIHLW40 | *Cambridgea annulata*  Dalmas 1917 | NZ, CH, Chatham Island, (43°45'39.2''S, 176°34'18.6''E), 3.iii.2016, LAW. Walker, A.F. Probert | NZAC03014730 | MK910934 | MK911554 |
| FIBLW029 | *Cambridgea annulata*  Dalmas 1917 | NZ, CH, Chatham Island, (43°51'31.8''S, 176°33'12.7''E), 30.i.2016, LAW, A.F. Probert | NZAC03014731 | MK910955 | MK911559 |
| *FICLW035 | *Cambridgea annulata*  Dalmas 1917 | NZ, CH, Chatham Island, (43°51'31.8''S, 176°33'12.7''E), 2.ii.2016, LAW, A.F. Probert | NZAC03014732 | MK910956 | MK911563 |
| JUN07C | *Cambridgea antipodiana* (White, 1849) | NZ, BR, Boyle River, (42°51'9''S, 172°38'4''E), 15.iii.2014, CJV | NZAC03014733 | MK910960 | MK911599 |
| *KIHLW132 | *Cambridgea antipodiana* (White, 1849) | NZ, BR, Greymouth, (42°27'23.9''S, 171°12'7''E), 8.i.2017, LAW, M.P. Fea | NZAC03014734 | MK910935 | MK911584 |
| QIALW090 | *Cambridgea antipodiana* (White, 1849) | NZ, SL, Tautuku bay, (46°34'48''S, 169°26'18''E), 17.xii.2016, LAW, E. Powell | NZAC03014735 | MK910963 | MK911600 |
| CAT02 | *Cambridgea arboricola* (Urquhart, 1891) | NZ, SL, Tautuku bay, (46°34'48''S, 169°26'18''E), 3.xii.2014, G. Hall, CJV, R. Hoare, O. Ball | NZAC03014736 | MK910948 | MK922529 |
| *D8BCV001 | *Cambridgea arboricola* (Urquhart, 1891) | NZ, SL, Tautuku bay, (46°34'47.4''S, 169°24'26.2''E), 3.xii.2014, G. Hall, CJV, R. Hoare, O. Ball | NZAC03014737 | MK910951 | MK911552 |
| G9BCV002 | *Cambridgea arboricola* (Urquhart, 1891) | NZ, SL, Tautuku bay, (46°34'48''S, 169°26'27.6''E), 3.xii.2014, G. Hall, CJV | NZAC03014738 | MK910958 | MK911574 |
| HIBLW087 | *Cambridgea arboricola* (Urquhart, 1891) | NZ, Sl, Southland, (46°34'48''S, 169°26'18''E), 17.xii.2016, LAW, E. Powell | NZAC03014767 | MK910936 | MK911581 |
| HICLW088 | *Cambridgea arboricola* (Urquhart, 1891) | NZ, SL, Southland, (46°34'48''S, 169°26'18''E), 17.xii.2016, LAW, E. Powell | NZAC03014768 | MK910924 | MK911570 |
| PIHLW070 | *Cambridgea arboricola* (Urquhart, 1891) | NZ, DN, Dunedin, (45°47'59.4''S, 170°30'38.5''E), 13.xii.2016, LAW, E. Powell | NZAC03014739 | MK910962 | MK911589 |
| B9S059 | *Cambridgea fasciata*  L. Koch, 1872 | NZ, BP, Wairata, (38°17'34.4''S, 177°20'2.1''E), 20.ii.2014, C.J. Painting, C.C. Nicholson | NZAC03014740 | MK910944 | MK911598 |
| C8BS030 | *Cambridgea fasciata*  L. Koch, 1872 | NZ, WO, Waitomo, (38°15'42.2''S, 175°0'51.4''E), 22.i.2014, LAW | NZAC03014741 | MK910946 | MK911587 |
| *C9BS060 | *Cambridgea fasciata* L  . Koch, 1872 | NZ, BP, Wairata, (38°17'34.4''S, 177°20'2.1''E), 20.ii.2014, C.J. Painting, C.C. Nicholson | NZAC03014742 | MK910947 | MK911583 |
| F9BS071 | *Cambridgea fasciata*  L. Koch, 1872 | NZ, AK, Waitakere, (36°51'55.5''S, 174°28'29.1''E), 25.ii.2014, L.A. Walker | NZAC03014743 | MK910954 | MK911588 |
| *A4S072A | *Cambridgea foliata*  (L. Koch, 1872) | NZ, AK, Waitakere Ranges, (36°53'8.4''S, 174°31'16.3''E), 12.x.2014, LAW, C.E. Forster | NZAC03014759 | MK910940 | MK911578 |
| B4S073A | *Cambridgea foliata*  (L. Koch, 1872) | NZ, AK, Waiheke Island, (36°49'17.5''S, 175°4'47.7''E), 11.x.2014, LAW, J.M. Green | NZAC03014760 | MK910942 | MK911590 |
| C4S074A | *Cambridgea foliata*  (L. Koch, 1872) | NZ, AK, Waitakere Ranges, (36°53'8.4''S, 174°31'16.3''E), 12.x.2014, LAW, C.E. Forster | NZAC03014761 | MK910945 | MK911596 |
| GIBLW077 | *Cambridgea obscura*  Blest & Vink, 2000 | NZ, DN, Dunedin, (45°48'31.4''S, 170°31'18.3''E), 12.xii.2016, LAW, E. Powell | NZAC03014762 | MK910916 | MK911568 |
| GIDLW080 | *Cambridgea obscura*  Blest & Vink, 2000 | NZ, SL, Catlins Forest , (46°25'41.7''S, 167°27'5''E), 12.xii.2016, LAW, E. Powell | NZAC03014763 | MK910931 | MK911562 |
| GIELW081 | *Cambridgea obscura*  Blest & Vink, 2000 | NZ, SL, Catlins Forest, (46°26'50.4''S, 169°29'52.4''E), 12.xii.2016, LAW, E. Powell | NZAC03014764 | MK910959 | MK911567 |
| GIFLW082 | *Cambridgea obscura*  Blest & Vink, 2000 | NZ, SL, Catlins Forest, (46°26'50.4''S, 169°29'52.4''E), 12.xii.2016, LAW, E. Powell | NZAC03014765 | MK910922 | MK911573 |
| GIGLW084 | *Cambridgea obscura*  Blest & Vink, 2000 | NZ, SL, Catlins Forest, (46°27'24.6''S, 169°29'42.5''E), 12.xii.2016, LAW, E. Powell | NZAC03014766 | MK910923 | MK911560 |
| *HIFLW094 | *Cambridgea obscura*  Blest & Vink, 2000 | NZ, SL, Southland, (46°34'48''S, 169°26'18''E), 17.xii.2016, LAW, E. Powell | NZAC03014769 | MK910937 | MK911557 |
| IICLW104 | *Cambridgea obscura*  Blest & Vink, 2000 | NZ, SL, Southland, (46°27'6.3''S, 167°28'40''E), 18.xii.2016, LAW, E. Powell | NZAC03014770 | MK910918 | MK911576 |
| NIGLW178 | *Cambridgea pallidula*  Blest & Vink, 2000 | NZ, WN, Upper Hutt, (41°10'21''S, 174°53'36.2''E), 17.iv.2017, LAW, C.J. Painting | NZAC03014771 | MK910929 | MK911558 |
| NIHLW182 | *Cambridgea pallidula*  Blest & Vink, 2000 | NZ, WN, Upper Hutt, (41°10'21''S, 174°53'36.2''E), 17.iv.2017, LAW, C.J. Painting | NZAC03014772 | MK910939 | MK911575 |
| *OIALW185 | *Cambridgea pallidula*  Blest & Vink, 2000 | NZ, WN, Upper Hutt, (41°3'36.2''S, 175°5'47.5''E), 16.iv.2017, LAW, C.J. Painting | NZAC03014773 | MK910961 | MK911550 |
| OIBLW188 | *Cambridgea pallidula*  Blest & Vink, 2000 | NZ, WN, Upper Hutt, (41°4'13''S, 175°11'58.5''E), 15.iv.2017, LAW, C.J. Painting | NZAC03014774 | MK910911 | MK911549 |
| PIBLW198 | *Cambridgea pallidula*  Blest & Vink, 2000 | NZ, WN, Upper Hutt, (41°4'13''S, 175°11'58.5''E), 15.iv.2017, LAW, C.J. Painting | NZAC03014775 | MK910933 | MK911569 |
| IIFLW109 | *Cambridgea peelensis*  Blest & Vink, 2000 | NZ, SC, Peel Forest, (43°53'37.7''S, 171°15'37.8''E), 4.i.2014, LAW, M.P. Fea | NZAC03014744 | MK910915 | MK911547 |
| JIBLW113 | *Cambridgea peelensis*  Blest & Vink, 2000 | NZ, SC, Peel Forest, (43°53'37.7''S, 171°15'37.8''E), 4.i.2014 LAW, M.P. Fea | NZAC03014745 | MK910913 | MK911577 |
| JICLW114 | *Cambridgea peelensis*  Blest & Vink, 2000 | NZ, SC, Peel Forest, (43°53'37.7''S, 171°15'37.8''E), 4.i.2014, LAW, M.P. Fea | NZAC03014746 | MK910920 | MK911566 |
| JIDLW115 | *Cambridgea peelensis*  Blest & Vink, 2000 | NZ, SC, Peel Forest, (43°53'37.7''S, 171°15'37.8''E), 4.i.2014, LAW, M.P. Fea | NZAC03014747 | MK910925 | MK911572 |
| JIELW117 | *Cambridgea peelensis*  Blest & Vink, 2000 | NZ, SC, Peel Forest, (43°53'24''S, 171°15'38.4''E), 4.i.2014, LAW, M.P. Fea | NZAC03014748 | MK910917 | MK911594 |
| *JIFLW118 | *Cambridgea peelensis*  Blest & Vink, 2000 | NZ, SC, Peel Forest, (43°53'24''S, 171°15'38.4''E), 4.i.2014, LAW, M.P. Fea | NZAC03014749 | MK910921 | MK911591 |
| *A6S001 | *Cambridgea plagiata*  Forster & Wilton, 1973 | NZ, WO, Waitomo, (38°15'42.2''S, 175°0'51.4''E), 19.xii.2013, LAW | NZAC03014750 | MK910941 | MK911555 |
| AIELW59 | *Cambridgea plagiata*  Forster & Wilton, 1973 | NZ, WO, Waitomo, (38°15'42.2''S, 175°0'51.4''E), 4.v.2016, LAW, J. McCambridge | NZAC03014751 | MK910909 | MK911592 |
| B8BS022 | *Cambridgea plagiata*  Forster & Wilton, 1973 | NZ, WO, Waitomo, (38°15'42.2''S, 175°0'51.4''E), 19.xii.2013, LAW | NZAC03014752 | MK910943 | MK911546 |
| F8BS055 | *Cambridgea quadromaculata* Blest &Taylor, 1995 | NZ, MC, Christchurch, (43°31'35.4''S, 172°35'57.2''E), 20.ii.2014, CJV, B.N. McQuillan | NZAC03014753 | MK910953 | MK911593 |
| JUN01 | *Cambridgea quadromaculata* Blest & Taylor, 1995 | NZ, DN, Portobello, (45°51'2''S, 170°39'10.4''E), 5.iii.2015 | NZAC03014754 | MK910928 | MK911561 |
| *JUN05 | *Cambridgea quadromaculata* Blest & Taylor, 1995 | NZ, MC, Banks Peninsula, (43°48'41''S, 173°1'4.7''E), 2.iii.2015, CJV | NZAC03014755 | MK910914 | MK911586 |
| Z4S074 | *Cambridgea quadromaculata* Blest & Taylor, 1995 | NZ, DN, Woodhaugh Gardens, (45°51'14.4''S, 170°30'36.5''E), 2014, S. Kerr | NZAC03014756 | MK910964 | MK911580 |
| *BIDLW003 | *Cambridgea reinga*  Forster & Wilton, 1973 | NZ, ND, Spirits Bay, (34°25'42.4''S, 172°51'43.5''E), 6.xii.2015, LAW, D. Seldon, TRB, R. Leschen | NZAC03014757 | MK910910 | MK911585 |
| BIELW016 | *Cambridgea reinga*  Forster & Wilton, 1973 | NZ, ND, Spirits Bay, (34°25'42.4''S, 172°51'43.5''E), 9.xii.2015, LAW, D. Seldon, TRB, R. Leschen | NZAC03014758 | MK910926 | MK911595 |
| *PIALW197 | *Badumna insignis*  (L. Koch, 1872) | NZ, AK, Leigh Marine Reserve, (36°16'15.3''S, 174°47'15.2''E), 22.v.2017, LAW, M. Merin, R. Le Grice | NZAC03014776 | MK910932 | MK911564 |
| *CIAISC | *Ischalea spinipes*  L. Koch, 1872 | NZ, WO, Waitomo, (38°15'42.2''S, 175°0'51.4''E), 4.xii.2015, LAW | NZAC03014777 | MK910949 | MK911548 |
| *BIFLW041 | *Nanocambridgea gracilipes*  Forster & Wilton, 1973 | NZ, AK, Waharau , (37°2'19.7''S, 175°17'40.4''E), 2.iii.2016, LAW | NZAC03014778 | MK910927 | MK911582 |
| US005 | *Stiphidion facetum*  Simon, 1902 | NZ, AK, Waiheke Island, (36°49'17.5''S, 175°4'47.7''E), 11.x.2014, LAW, J.M. Green | NZAC03014779 | MK910919 | MK911556 |
| *US008 | *Stiphidion facetum*  Simon, 1902 | NZ, AK, Waiheke Island, (36°49'17.5''S, 175°4'47.7''E), 11.x.2014, LAW, J.M. Green | NZAC03014780 | MK910912 | MK911565 |
